## 1                    **Modeling Influenza Seasonality in the Tropics and Subtropics**

2                    Haokun Yuan<sup>1\*</sup>, Sarah C. Kramer<sup>2\*#</sup>, Eric H. Y. Lau<sup>3,4</sup>, Benjamin J. Cowling<sup>3,4</sup>, Wan Yang<sup>1\*\*</sup>

3                    *<sup>1</sup>Department of Epidemiology, Mailman School of Public Health, Columbia University, New*  
4                    *York, NY 10032*

5                    *<sup>2</sup>Department of Environmental Health Sciences, Mailman School of Public Health,*  
6                    *Columbia University, New York, NY 10032*

7                    *<sup>3</sup>WHO Collaborating Centre for Infectious Disease Epidemiology and Control, School of Public*  
8                    *Health, Li Ka Shing Faculty of Medicine, the University of Hong Kong, Hong Kong Special*  
9                    *Administrative Region, China*

10                  *<sup>4</sup>Laboratory of Data Discovery for Health Limited, Hong Kong Science Park, New Territories,*  
11                  *Hong Kong Special Administrative Region, China*

12                  \*These authors contribute equally to this work. #Current address: Infectious Disease  
13                  Epidemiology group, Max Planck Institute for Infection Biology, Charitéplatz 1, Campus  
14                  Charité Mitte, 10117 Berlin, Germany

15  
16                  \*\*Correspondence to:

17                  Wan Yang

18                  Department of Epidemiology

19                  Mailman School of Public Health

20                  Columbia University

21                  722 W 168th Street, Room 514, New York, NY 10032

22                  Phone: (212) 305-0421

23                  Email: wy2202@columbia.edu

24  
25                  **Data and model code availability:** Compiled daily temperature and specific humidity  
26                  data along with model code are available at [https://github.com/wan-yang/flu-subtropic-](https://github.com/wan-yang/flu-subtropic-climate-models)  
27                  [climate-models](https://github.com/wan-yang/flu-subtropic-climate-models). Influenza data (after 2014) are available from  
28                  <https://www.chp.gov.hk/en/statistics/data/10/641/642/2274.html>

## 30 **Abstract**

31 Climate drivers such as humidity and temperature may play a key role in influenza  
32 seasonal transmission dynamics. Such a relationship has been well defined for temperate  
33 regions. However, to date no models capable of capturing the diverse seasonal pattern in  
34 tropical and subtropical climates exist. In addition, multiple influenza viruses could  
35 cocirculate and shape epidemic dynamics. Here we construct seven mechanistic epidemic  
36 models to test the effect of two major climate drivers (humidity and temperature) and  
37 multi-strain co-circulation on influenza transmission in Hong Kong, an influenza epidemic  
38 center located in the subtropics. Based on model fit to long-term influenza surveillance  
39 data from 1998 to 2018, we found that a simple model incorporating the effect of both  
40 humidity and temperature best recreated the influenza epidemic patterns observed in  
41 Hong Kong. The model quantifies a bimodal effect of absolute humidity on influenza  
42 transmission where both low and very high humidity levels facilitate transmission  
43 quadratically; the model also quantifies the monotonic but nonlinear relationship with  
44 temperature. In addition, model results suggest that, at the population level, a shorter  
45 immunity period can approximate the co-circulation of influenza virus (sub)types. The  
46 basic reproductive number  $R_0$  estimated by the best-fit model is also consistent with  
47 laboratory influenza survival and transmission studies under various combinations of  
48 humidity and temperature levels. Overall, our study has developed a simple mechanistic  
49 model capable of quantifying the impact of climate drivers on influenza transmission in  
50 (sub)tropical regions. This model can be applied to improve influenza forecasting in the  
51 (sub)tropics in the future.

52

53 **Key words:** Influenza; climate; seasonality; co-circulation; temperature; humidity; tropics;  
54 subtropics

55

## 56 **Introduction**

57 Influenza is a disease of considerable public health concern, causing roughly 300,000-  
58 650,000 deaths and 3-5 million cases of severe illness each year worldwide [1]. Although  
59 evidence suggests that the burden of influenza in the tropics and subtropics is not  
60 substantially less than in temperate regions [2, 3], studies on influenza in these regions are

61 comparatively rare. Likewise, modeling and forecasting efforts, which may promote both  
62 understanding of and preparation for outbreaks in the future, have mostly been focused on  
63 countries with temperate climates [4, 5]. A variety of factors contribute to this disparity,  
64 including lack of long-term surveillance data and competing public health interests [6-8].  
65 We focus here on two features of influenza epidemics in these regions that particularly  
66 complicate modeling efforts, i.e., the lack of understanding of climatic drivers and  
67 cocirculation of multiple influenza types and subtypes.

68  
69 In temperate regions, influenza displays a clear seasonal pattern, with epidemics  
70 occurring in the winter and very few cases observed during the summer [9, 10]. While  
71 several potential drivers of this pattern have been suggested [9], humidity appears to be  
72 particularly important in driving these “seasonal” influenza epidemics. Specifically, both  
73 survival and transmission of the influenza virus are heightened when absolute humidity  
74 (AH) is low [11], corresponding to the yearly observed peaks of influenza activity in winter  
75 [12].

76  
77 In tropical or subtropical locations, this seasonal pattern is less commonly observed.  
78 Instead, influenza causes multiple epidemics each year, or else is present year-round with  
79 unpredictable variation in intensity [3, 9, 10, 13]. In addition, humidity is relatively high all  
80 year in the tropics and subtropics, and influenza epidemics tend to occur during the rainy  
81 season, when humidity is particularly high [13, 14]. Thus, the relationship observed in  
82 temperate regions and modeled by Shaman et al. [12], where influenza transmission  
83 decreases monotonically with increasing AH, is not sufficient to explain patterns in  
84 influenza transmission in the tropics and subtropics [9, 15].

85  
86 While the exact impacts remain unclear, humidity, precipitation and temperature  
87 are the main contenders as climate drivers for influenza transmission in the tropics and  
88 subtropics. A few studies suggest that the impact of humidity on influenza transmission  
89 may be bimodal, rather than unimodally decreasing as suggested by Shaman et al. [11, 12].  
90 Work by Yang et al. showed that influenza virus survival is higher at lower relative  
91 humidity (<50%), but also found increased survival at very high levels of relative humidity

92 (~100%) [16]. By analyzing patterns of influenza transmission in 78 locations worldwide,  
93 Tamerius et al. [14] found that influenza outbreaks in locations that experience high  
94 temperature and high AH year-round had a tendency to occur during the rainy season,  
95 when both AH and rainfall were high. This pattern has been consistently reported in  
96 several countries [6, 17-19]. Deyle et al. [20] instead suggested that influenza transmission  
97 is driven by AH, moderated by temperature. Specifically, they find that influenza activity  
98 decreases with increasing AH up to about 24°C (75 °F), then increases with increasing AH  
99 up to about 30°C (86°F), at which point high temperatures strongly restrict influenza  
100 transmission.

101  
102 In addition to diverse climate drivers, co-circulation of multiple influenza viruses  
103 may contribute to the observed multiple yearly influenza epidemics in the tropics and  
104 subtropics. Circulating human influenza viruses are classified into types (A or B, based on  
105 genus) and, among influenza A viruses, subtypes (based on the genetic sequences of the  
106 hemagglutinin and neuraminidase surface proteins) [21]. Currently, circulating human  
107 influenza viruses consist of the A(H1N1) and A(H3N2) influenza subtypes, as well as  
108 influenza B viruses [1]. While influenza viruses evolve quickly, significant antigenic change  
109 only occurs over a period of one to ten years [22, 23]. However, while the extent of cross-  
110 immunity between influenza (sub)types remains unknown, current influenza vaccines are  
111 not sufficient to protect people from all (sub)types of influenza virus [21, 24]. Thus, we may  
112 expect that separate epidemics within a single year are often caused by different influenza  
113 viruses. As a result, appropriate models of influenza transmission in tropical and  
114 subtropical locations may need to take multiple types and subtypes into account, further  
115 complicating modeling efforts.

116  
117 Here, we utilize influenza incidence data that have been collected since 1998 in  
118 Hong Kong, a densely populated city with a subtropical climate, to explore the impact of  
119 climate drivers on influenza epidemics. We formulate seven models, each allowing for  
120 differing roles of humidity, temperature, and influenza co-circulation. We expect that, by  
121 accounting for 1) increased transmission at both low and high values of AH, 2) decreased  
122 transmission at high temperatures (e.g., >30 °C), and 3) co-circulation of several influenza

123 types and subtypes, the model best representing the impact of key climate drivers and  
124 influenza co-circulation will be able to best reproduce observed influenza dynamics in  
125 Hong Kong. In addition, influenza pandemics could occur “off-season” under more extreme  
126 climate conditions (e.g., hot summer days), due to higher population susceptibility to a  
127 novel virus. Thus, we include the 2009 pandemic in our model testing and expect the best-  
128 performing model to also capture influenza dynamics during the pandemic after  
129 accounting for the increased population susceptibility. To model the impact of humidity,  
130 here we focus on AH as it is independent of temperature. Specifically, unlike relative  
131 humidity measuring the amount of water vapor (i.e. moisture) in the air relative to the total  
132 amount of vapor that can exist in the air at its current temperature, AH measures the actual  
133 amount of water vapor in the air irrespective of the air’s temperature.

134

## 135 **Methods**

136 **Influenza Data:** Data on influenza-like illness (ILI) and laboratory-confirmed influenza  
137 from January 1998 through December 2018 were obtained from the Centre for Health  
138 Protection of the Hong Kong Special Administrative Region. ILI data were collected by a  
139 sentinel surveillance network consisting of 64 public out-patient clinics and roughly 50  
140 private medical practitioners’ clinics throughout Hong Kong, while laboratory testing was  
141 performed on specimens from outpatient clinics and public hospitals. Throughout our  
142 study period (21 years from January 1998 to December 2018), the same procedure for  
143 selecting specimens for viral testing was used; however, from February 10, 2014 onward,  
144 viral testing was carried out using molecular testing instead of viral culture. We multiply  
145 weekly ILI case counts by the proportion of tests positive for influenza each week and refer  
146 to the resulting, more specific measure as ILI+. Finally, data were converted to rates per  
147 100,000 population.

148

149 **Climate Data:** Hong Kong has a humid subtropical climate, with hot, humid, and rainy  
150 summers, and mild winters [25]. Daily mean temperature and relative humidity were taken  
151 at the Hong Kong Observatory [26]. Using these data, we used the Clausius-Clapeyron  
152 relation [27] to calculate daily mean specific humidity, a measure of AH (see  
153 Supplementary Materials).

154

155 **Model Hypotheses:** In this work, we formulated seven models to test several hypotheses  
156 concerning the impact of humidity and temperature on influenza transmission in Hong  
157 Kong, and how co-circulation influenza (sub)types affect this process. While specific  
158 methodology associated with each model is detailed below, we describe the hypotheses  
159 considered here:

- 160 • Null hypothesis 1 (or Null1, Constant basic reproductive number  $R_0$ ): Climate  
161 conditions have no effect on influenza transmission. To represent this, we held  $R_0$ , the  
162 epidemic parameter representing the average number of new cases arising from a  
163 primary case in a fully susceptible population, constant.
- 164 • Null hypothesis 2 (or Null2, Temperate Forcing): AH affects influenza transmission in  
165 the subtropics and tropics in the same manner as in temperate regions; that is,  $R_0$   
166 increases monotonically with decreasing AH. Here,  $R_0$  was modeled according to the  
167 equation first presented in [11]. This model has previously been shown to perform well  
168 when modeling influenza transmission patterns in temperate regions [12].
- 169 • AH model: The effect of AH is bimodal, with both low and high AH conditions favoring  
170 influenza transmission. Temperature is assumed to have no additional effect on  
171 transmission.  $R_0$  was modeled according to Eqn S6, where both low and high values of  
172 AH lead to higher values of  $R_0$ .
- 173 • AH/T model: Absolute humidity has a bimodal effect on  $R_0$ , as in the AH model, but  
174 this effect is moderated by temperature as shown in Equation 3. Briefly, low  
175 temperatures promote influenza transmission, and temperatures above a certain  
176 threshold limit transmission.
- 177 • AH/T/Strain: AH and temperature impact  $R_0$  as in the AH/T model. Additionally, two  
178 “strains” of influenza co-circulate in the population, as in [12]. Here we ignore cross-  
179 immunity between strains; in other words, infection with one strain has no effect on the  
180 potential for later infection with the other strain.
- 181 • AH/T/Short: Climate forcing is included as in the AH/T model. Additionally, we restrict  
182 the duration of immunity in the model to be about 1 year (i.e., 0.5 – 1.5 years), in order  
183 to implicitly take co-circulation into account (i.e., for an individual, multiple infections  
184 by different influenza strains could occur within a short time span).

- 185 • AH/T/Vary: Climate forcing is included as in the AH/T model. Additionally, a small  
186 proportion (<50%) of the population experiences a significantly truncated duration of  
187 immunity (<1 year) after infection. In other words, duration of immunity to influenza is  
188 heterogeneous among the population.

189

190 **SIRS Model:** We modeled influenza transmission in Hong Kong using a compartmental  
191 susceptible-infected-recovered-susceptible (SIRS) model with demography. While we used  
192 two distinct forms of the model for this project described below, the basic model takes the  
193 form:

194

$$\left\{ \begin{array}{l} \frac{dS}{dt} = \frac{N - S - I}{L} - \frac{\beta_t I^p S}{N} - \alpha + \mu(N - S) \\ \frac{dI}{dt} = \frac{\beta_t I^p S}{N} - \frac{I}{D} + \alpha - \mu I \end{array} \right.$$

[1]

195

196 where  $N$  is the size of the model population (here set to 100,000);  $\beta_t$  represents the  
197 rate of transmission on day  $t$ , depending on climatic functions as described below;  $D$  is the  
198 mean infectious period;  $L$  is the average duration of immunity; and  $\alpha$  represents random  
199 seeding from outside the model population (here we arbitrarily set it to 0.1, i.e. 1 per 10  
200 days for all models).  $\mu$  is the rate of natural birth and death (i.e., to maintain a constant  
201 population size, we assume equal birth and death rates). We set  $\mu$  to be 0.00918 divided by  
202 365, or the average daily birth rate per person in Hong Kong during 1998 – 2017 [28]. The  
203 parameter  $p$  is an exponent to introduce nonlinearity into the infection process (i.e.  
204 imperfect population mixing). The inclusion of this parameter has been shown to be helpful  
205 in modeling complicated epidemics using very simple models [29], as is the case in this  
206 work. Finally, because the 2009 pandemic was caused by a novel strain of influenza with  
207 little prior population immunity, we reset the number of susceptibles in our population in  
208 early August of 2009 to be between 60% and 80% of the total population [30-32] (vs. 40-  
209 80% for model initiation in January 1998; see Table 1). All models were run stochastically,  
210 as described in the Supplementary Materials and in [12].

211  
212  
213  
214  
215  
216  
217  
218  
219  
220  
221  
222  
223  
224  
225  
226  
227  
228  
229  
230  
231  
232  
233  
234

**SIRS Model Variations:** In this work, we considered three models to account for cocirculation and heterogenous immunity period:

**1) AH/T/Strain:** To account for co-circulating influenza viruses, we ran two SIRS simulations (Eqn 1) in parallel, as done in Shaman et al. [12]. While there are three co-circulating influenza (sub)types, we combined A(H1N1) and B for simplicity, given the similar timing of the circulation of these two viruses (Fig S1). Here, we applied random seeding at each week only to the “strain” that had the greater number of positive tests that week. If both “strains” were equally common, seeding was applied to a single strain at random. We then combined the output of the two simulations and compared the resulting estimates to the overall ILI+ data. Note that per this simple model, multiple influenza epidemics due to different influenza viruses can occur at the same time, as well as co-infection of multiple influenza viruses.

**2) AH/T/Short:** This model used Equation 1 but restricted  $L$ , the duration of immunity, to be between around one year to account for multiple infections within a year due to multiple circulating strains.

**3) AH/T/Vary:** In this model, a small proportion of the population loses immunity to influenza at an accelerated rate. This was modeled by replacing the term  $\frac{N-S-I}{L}$  in Equation 1 with:

$$\rho \frac{\beta_{t-L_s} I_{t-L_s}^p S_{t-L_s}}{N} + (1 - \rho) \frac{N - S - I}{L} \quad [2]$$

235  
236  
237

where  $\rho$  is the proportion of the model population that loses immunity after a short period  $L_s$  and  $\beta_{t-L_s} I_{t-L_s}^p S_{t-L_s}$  represents the number of new infections  $L_s$  days ago, who would lose



238 their immunity on day  $t$ . We note that, since longer-term immunity is lost at an exponential  
239 rate, while short term immunity simply removes a set number of individuals from the  
240 recovered compartment at each time step, there is a possibility of double-counting.  
241 However, given the difference in time scales (less than one year vs. several years), we do  
242 not anticipate that this approximation will lead to severe problems.

243  
244 **Climate Forcing Models:** Based on past work [12, 14, 16, 20], as well as the patterns  
245 observed in the influenza and climate data described above and shown in Fig 1, we  
246 modeled the impact of AH using a parabola, where transmissibility is highest at very low  
247 and very high levels of AH. In all AH/T models, this relationship was modified by  
248 temperature such that, when temperature is above some cutoff value, transmissibility is  
249 reduced. Specifically, for models AH/T, AH/T/Strain, AH/T/Short, and AH/T/Vary, the  
250 impact of AH and temperature on transmissibility was modeled as:

251

$$R_0(t) = [aq^2(t) + bq(t) + c] \left[ \frac{T_c}{T(t)} \right]^{T_{exp}} \quad [3]$$

252  
253 where  $q(t)$  is specific humidity (i.e. a measure of AH) at time  $t$ , and  $T(t)$  is temperature at  
254 time  $t$ . The parameter  $\beta_t$  in the SIRS model is defined as  $R_0(t)$  divided by  $D$ ; thus, AH and  
255 temperature act through  $\beta$  in Equations 1 and 2 to influence transmission patterns. When  $T$   
256 is below  $T_c$ , lower temperatures are able to further increase  $R_0$ , whereas temperatures  
257 above  $T_c$  inhibit influenza transmission. However, the favorable impact of low temperature  
258 may level off at relatively low temperatures. Thus, we truncated this monotonic  
259 relationship at a minimum temperature of  $T_c - T_{diff}$ , beyond which, the effect levels off. The  
260 strength of this relationship is further determined by the exponent  $T_{exp}$ . For the AH Only  
261 model, AH was also modeled as a parabola (i.e. the terms within the first set of squared  
262 brackets), but with no impact of temperature (Eqn. S6).

263

264 To link the coefficients  $a$ ,  $b$ , and  $c$  to the AH  $q$  and  $R_0$ , we reparametrize them by  
265 solving the parabola with the nadir at  $(q_{mid}, R_{0min})$  and maximum at both  $(q_{min}, R_{0max})$  and  
266  $(q_{max}, R_{0max})$  (see Supplemental Materials).

267  
268 **Model optimization (parameter tuning):** To assess the validity of the models, we first  
269 split the influenza data into a training set (Jan 1998 – Dec 2012; 15 years) and a testing set  
270 (Jan 2013 – Dec 2018; 6 years). That is, data from 1998 to 2012 were used to train the  
271 model and optimize parameters, the remaining data from 2013 to 2018 were holdout for  
272 testing.

273  
274 We optimized each model by testing a wide range of parameter values (Table 1)  
275 based on the literature [12, 22, 23, 33-39], and tuning parameter range against the  
276 influenza data observed during Jan 1998 – Dec 2012 (i.e. the training period). Specifically,  
277 for each model, we draw 1 million parameter combinations from ranges listed in Table 1  
278 using Latin hypercube sampling [12]. Using each parameter combination, we ran each  
279 model stochastically from Jan 1998 to Dec 2012 with a daily time step and aggregated the  
280 simulated daily ILI+ to weekly intervals for model assessment. To account for model  
281 stochasticity, we repeated the simulation 500 times for each parameter set. We then  
282 calculated, for each model run, the corresponding root mean square error (RMSE) and  
283 correlation against the full training dataset and weekly averaged dataset (i.e., for each of  
284 the 52 weeks of the year, averaged the ILI+ over 15 training years), separately; We refer to  
285 these metrics as *full.RMSE*, *avg.RMSE*, *full.Correlation* and *avg.Correlation*, respectively,  
286 hereafter. We further averaged across the 500 model runs for each parameter combination  
287 to obtain a single set of metrics for the corresponding parameter combination. To combine  
288 the metrics and simplify the process of parameter selection, we averaged the two RMSE  
289 metrics (RMSES) and the two correlation metrics (CORR), separately, as:

$$290 \quad RMSES = 0.5 \text{ full.RMSE} + 0.5 \text{ avg.RMSE}$$

291 and:

$$292 \quad CORR = 0.5 \text{ full.Correlation} + 0.5 \text{ avg.Correlation}$$

293

294           Based on these two final metrics, we selected the top 1000 parameter combinations  
295 out of the one million for each model: the 1000 with the highest *CORR* among those with  
296 RMSES lower than the 0.5 percentile. We then computed the 95% highest density interval  
297 (HDI) for each parameter using those top 1000 to generate new parameter ranges for  
298 subsequent round of optimization. That is, we updated the range of a parameter with the  
299 HDI, if the upper (or lower) bound of HDI is 10% smaller (or larger) than the  
300 corresponding bound of the original range. This tuning process was repeated until the  
301 parameter range no longer shrinks substantially (i.e. by 10%). In this study, it took two  
302 rounds of such parameter selection; at each round, we checked to ensure the model fit was  
303 improving using the new parameter ranges.

304  
305           After obtaining the final parameter ranges, we drew 10,000 random parameter  
306 combinations from these final ranges and ran the models from Jan 1998 – Dec 2018 using  
307 each parameter combination. In this last batch, we obtained the top 1000 parameter  
308 combinations as described above for further assessment and model comparison.

309  
310   **Model assessment:** We evaluated performance of the seven models based on the four  
311 metrics described above (i.e., *full.RMSE*, *avg.RMSE*, *full.Correlation*, *avg.Correlation*) during  
312 both the training and testing period. To quantify the differences in performance among  
313 models, we applied the Kruskal-Wallis test to test if the mean rank of different models were  
314 similar for each metric. Since significant differences were found between models, we  
315 further performed a pairwise comparison using the Nemenyi test with an adjusted p-value  
316 of 0.007 (i.e., 0.05 / 7). We summarized the model ranking in Table 2 based on model  
317 performances including the pandemic period. In addition, as a sensitivity analysis, we  
318 ranked the models based on their performances excluding the 2009 pandemic in Table S1.

319

## 320 **Results**

321   **General influenza transmission dynamics in Hong Kong.** Influenza activity is highly  
322 diverse in Hong Kong. Unlike the common wintertime epidemics in temperate regions,  
323 during our study period (Jan 1998– Dec 2018), Hong Kong experienced two epidemics per  
324 year in most years (17 out of 21; the four exceptions were: Year 2001, 2011, 2012 and

2018; Fig 1A). For years with two epidemics, one epidemic typically occurred during the winter, and the other, usually smaller in magnitude, occurred during the summer (Fig 1A). Usually, there was a single influenza (sub)type predominating during each epidemic, although co-circulation of multiple strains with comparable magnitudes could occur (Fig 1A). While any (sub)type can dominate winter epidemics, summer epidemics were almost always caused by A(H3N2) (15 out of 17 years with summer epidemics; Fig 1A).

**Climate conditions in Hong Kong overall and during influenza epidemics.** Both mean daily temperature and AH in Hong Kong displayed strong seasonality, where temperature and AH were highest in summer and lowest in winter (Fig 1B). In the hottest days, the mean temperature in Hong Kong can exceed 30°C (around six days per year), but most of the time, mean temperature was between 15°C to 30°C. Hong Kong was also very humid. Compared to the relatively drier and cooler climates in temperate regions, the humid climate in Hong Kong may provide favorable conditions for influenza transmission during the summer despite the high temperatures. In addition, temperature and AH were highly correlated (Pearson's  $\rho = 0.94$ ,  $p < 0.001$ ). Such a high correlation could confound the potential effect on influenza activity due to either climate variable and suggests that simple linear models will not be able to separate such effects.

**Models incorporating the impact of humidity and temperature best replicate the influenza dynamic in Hong Kong.** In this work, we designed seven models and performed two rounds of parameter selection to obtain the optimized HDI for each parameter in every model, and eventually compared the models using the selected parameter combinations. Among the seven models constructed, the Null1 model served as a “control” model since it had a constant  $R_0$  that is independent of any climate factors. In other words, if a model failed to outperform the Null1 model, then the proposed relationship between climate factors and the influenza transmission dynamics would not be supported. In addition, we note, again, that we included the 2009 influenza pandemic in our main analysis, because the off-season occurrence of pandemic influenza provided a unique opportunity to test the climate forcing models under more extreme climate conditions. Table 2 shows the model

355 ranking including the pandemic and Table S1 excluding the pandemic. Results are  
356 consistent across the two analyses.

357

358 Overall, all models incorporating seasonality outperformed the Null1 model, for  
359 which  $R_0$  is set to a constant (mean testing rank: 6.5 out of seven models; Table 2 and Fig  
360 2), suggesting the seasonal variation of influenza activity. In addition, while the AH model  
361 (i.e. without including temperature as a variable) outperformed the Null1 model, it was  
362 consistently inferior when compared to other models (mean testing rank: 5.5 out of 7  
363 models; Table 2, Fig 2). The model failed to capture much of the dynamics observed in  
364 Hong Kong, especially in colder months (Fig S2C). This suggests that, in addition to AH,  
365 temperate can modulate influenza transmission in Hong Kong.

366

367 To test if the monotonic increase in transmission with decreasing AH as observed in  
368 temperate regions also applies to the subtropics, we also tested the model by Shaman et al.  
369 (i.e. the Null2 model here). The Null2 model was able to better recreate the observed  
370 transmission dynamics in Hong Kong than the Null1 and AH model. However, its  
371 performance during the training period ranked lower than models additionally  
372 incorporating increasing transmission under high AH conditions (i.e. a bimodal relation)  
373 (Table 2).

374

375 Models incorporating the impact of both AH and temperature improved the model  
376 performance significantly (Fig 2). The AH/T models (AH/T, AH/T/Short, AH/T/Vary, and  
377 AH/T/Strain) had the best performance among all. Among these four models, the AH/T and  
378 AH/T/Short models assumed the same model construct but with different initial ranges for  
379 the immunity duration ( $L$ ). After rounds of parameter selection, the HDI of  $L$  eventually  
380 converged for the two models (Table 1), as did other parameters. Therefore, we considered  
381 these two models to be the same. Indeed, either model ranked among the top two during  
382 the training period. However, the AH/T model appeared to be more stable and remained as  
383 a top performing model during the testing period (Table 2).

384

385 Two models (i.e., AH/T/Vary and AH/T/Strain) additionally accounted for  
386 long/short-term immunity and/or co-circulation of different influenza viruses. Both  
387 models performed comparably to the AH/T model but not better (Fig 3). In addition, for the  
388 common parameters, the HDIs of the three models converged to similar ranges (Table 1).  
389 The AH/T/Vary model, although formulated differently, had similar HDI and performances  
390 as the AH/T model. The AH/T/Strain model was the only model that specifically accounted  
391 for co-circulation of different influenza viruses. Although the model was able to simulate  
392 ILI+ with high correlation with the observed data and recreate large epidemics, it did not fit  
393 smaller epidemics as well and thus had a high RMSE (Fig 3).

394

395 Taken together, the AH/T model had the most consistent and best performance over  
396 the entire study period. It is also the most parsimonious model among all top performing  
397 ones.

398

399 **Impact of humidity and temperature on influenza transmission, as estimated by the**  
400 **top models.** To account for the impact of humidity on influenza transmission, we included  
401 three parameters in the models to describe a bimodal relationship. That is, below a  
402 threshold AH ( $q_{mid}$ ), transmission would increase as AH decreases and level off when AH is  
403  $\leq q_{min}$ , whereas above that threshold, transmission would increase as AH increases and  
404 level off when AH is  $\geq q_{max}$ . Tamerius et al 2013 [14] defined a similar bimodal relationship  
405 and found a threshold of 11-12 g/kg for regions with single-peak vs bimodal epidemics. In  
406 addition, they found that most influenza peak activities occurred in “cold-dry” conditions  
407 (i.e., AH < 8 g/kg) or “humid-rainy” conditions (AH > 14 g/kg). Consistent with Tamerius et  
408 al., we estimated the threshold  $q_{mid}$  to be 10 – 12.6 g/kg, where  $R_0$  troughs (Fig 4). In  
409 addition, we further quantified how influenza transmission (i.e. as indicated by  $R_0$   
410 estimates) changes with AH in the two regimes (Eqn 3). We estimated that when AH is  
411 below 10-12.6 g/kg,  $R_0$  would increase with decreasing AH quadratically up to a minimum  
412 of 2 – 4 g/kg; when AH is above 10-12.6 g/kg,  $R_0$  would increase with increasing AH  
413 quadratically up to a maximum of 17-20 g/kg (Table 1).

414

415 In addition to AH, we included three parameters to model the impact of temperature  
416 on influenza transmission. Foremost, as described in Eqn 3, the impact of temperature is  
417 modeled as a multiplicative adjustment to the impact of AH. Below a threshold temperature  
418  $T_c$ , decreasing temperature increases transmission up to a minimum of  $T_c - T_{diff}$ ; above  $T_c$ ,  
419 increasing temperature reduces transmission. Deyle et al. [20] suggested temperature  
420 around 24°C (75°F) as a threshold dividing the negative and positive effect of AH on  
421 transmission. Similarly, we estimated  $T_c$  to have an HDI between 20-24°C (Table 1). As  
422 shown in Fig 4, when temperature is below  $T_c$ , low temperature further facilitates  
423 transmission, in addition to the favorable transmission conditions due to concurrent, low  
424 AH in cold months. However, when temperature exceeds  $T_c$ , high temperature suppresses  
425 transmission and lowers the overall  $R_0$  despite the favorable transmission conditions due  
426 to concurrent, very high AH in the summer. In addition, we estimated  $T_{diff}$  to have an HDI of  
427 0.4-5.3°C, which implies temperature below 16-23°C does not afford additional increases  
428 in transmission. Similar transmission behavior was also found by Brown et al. [33] with  
429 avian influenza viruses, whose infectiveness stabilized after the temperature dropped  
430 below 17°C. The estimated value of  $T_{exp}$ , the exponent of the  $T_c/T$  ratio (Eqn 3), had an HDI  
431 of 0.95-1.54, suggesting the moderation of temperature is slightly super-linear.

432  
433 We also estimated the duration of immunity ( $L$ ) with our models to better  
434 understand transmission dynamics. The immunity period  $L$  directly affects the frequency of  
435 influenza epidemics – i.e., shorter  $L$  would lead to more frequent epidemics. Here we  
436 estimated  $L$  to be around 1-1.3 years for the AH/T model, and 1.5-2.3 year for AH/T/Strain.  
437 For the AH/T/Vary model, considering population heterogeneity, we included another  
438 parameter  $L_s$  to represent short-term immunity (<1 year). We found  $L_s$  was around 3-11  
439 months and  $L$  around 1-1.6 years; combining these two parameters (i.e.,  $L$ ,  $L_s$ ), the average is  
440 very similar to the  $L$  estimated by the AH/T model. Overall, these  $L$  estimates are consistent  
441 with the frequent influenza epidemics observed in Hong Kong; however, we note that these  
442 estimates are on the lower end of the reported 1-10 year range [22].

443

444 **Validate model findings using laboratory results.** The reproductive number represents  
445 the epidemic potential of an infection. To examine if the identified relationship with AH and  
446 temperature is consistent with data from laboratory studies, we further compared the  
447 basic reproductive number  $R_0$  and effective reproductive number  $R_e$  calculated by our  
448 model (Eq 3) with the influenza virus survival rate in aerosols [35] as well as the influenza  
449 transmission rate observed in guinea pigs [39, 40]. At the population level, epidemic can  
450 occur when  $R_e$  is above 1 and will subside when  $R_e$  drops below 1. Indeed, no transmission  
451 occurred in the guinea pig studies [40] under conditions where the estimated  $R_e$  per our  
452 model (Eqn 3) was below 1; in contrast, transmission occurred when estimated  $R_e$  was  
453 above 1, ranging 1.21-2.25 (corresponding  $R_0$  range: 1.68-3.11; Fig. 5). In addition, fitting a  
454 linear regression of estimated  $R_0$  (or  $R_e$ ) against the log survival rate and log transmission  
455 probability, we found that estimated  $R_0$  (or  $R_e$ ) positively correlated with both laboratory-  
456 observed survival rate and transmission rate of the influenza virus (Fig 5). In particular, the  
457 correlation between  $R_0$  (or  $R_e$ ) estimated by our AH and temperature model (Eqn 3) and  
458 the observed transmission rate was 0.82 ( $r^2 = 0.67$ ; Fig 5), suggesting it was able to explain  
459 around 70% of the variances of the transmission rate. These findings indicate that our  
460 model is able to represent both the impact of AH and temperature on influenza epidemic  
461 patterns at the population level as well as influenza transmission and survival observed in  
462 laboratory settings.

463

## 464 **Discussion**

465 Despite influenza's profound impact on public health, little is known about how the virus  
466 transmits from person to person and what environmental and climate conditions make this  
467 process more likely. To date, there have been only a few studies on the influenza burden in  
468 tropical and subtropical regions. Of those studies, a handful analyzed the effect of climate  
469 drivers on influenza incidence using time-series or logistic regression models. Although  
470 those statistical models were able to identify significant climate covariates (including AH,  
471 temperature, and precipitation) and estimate the effect size, they did not provide much  
472 information to the underlying mechanism of how those climate covariates affect  
473 transmission. In contrast, infectious disease models (e.g., the SIRS model) provide a means  
474 to model and test the relationship between climate factors and influenza transmission



475 observed in laboratories. In this work, by building seven SIRS models under different  
476 hypotheses, we explored how temperature, AH, and influenza co-circulation affect the  
477 transmission of influenza. We showed that models that included both AH and temperature  
478 as covariates consistently outperformed those that did not in recreating the observed  
479 influenza epidemic patterns in Hong Kong. These results support that climate variables  
480 play a critical role in influenza transmission, where temperature is particularly influential  
481 in moderating the impact of AH. Model results also indicate that the effect of climate  
482 drivers in tropical and sub-tropical regions is different from those observed in the  
483 temperate regions, and models built for temperate areas will not be sufficient to reproduce  
484 the transmission patterns in the tropics or the subtropics.

485  
486 Previous studies had suggested a bimodal effect of AH on influenza transmission  
487 [20]. However, such an effect has not been quantified nor incorporated in influenza  
488 transmission models as done for temperate regions [12]. Here, we have developed a model  
489 that can effectively represent this U-shaped relationship with AH, moderated further by  
490 temperature. When incorporated into an SIRS model, the combined model was able to  
491 recreate the diverse influenza epidemic dynamics observed in Hong Kong over a 21-year  
492 period. As described earlier, the breaking point between the “cold-dry” and “hot-humid”  
493 environment is an AH of approximately 10-12.6 g/kg, which is consistent with Tamerius et  
494 al 2013 [14]. This finding helps to explain the biannual epidemics observed in Hong Kong.  
495 In the winter when weather is “cold-dry,” the influenza transmission rate increases as the  
496 environment gets drier. On the other hand, summer in Hong Kong is hot and humid – the  
497 very high AH also promotes influenza transmission, despite high temperatures.

498  
499 The combined relationship of influenza transmission with both AH and temperature  
500 we delineated in Fig 4 also consistently explains observations in temperate regions where  
501 influenza surges predominantly in winter and increases monotonically with decreasing AH.  
502 During summers in temperate areas, absolute AH is typically lower than 15 g/kg (vs. as  
503 high as 23g/kg in subtropics/tropics) [12], and temperature is relatively high. Under such  
504 environmental conditions,  $R_0$  would stay in the trough during the summer (Fig 4), and only  
505 increases in the winter when AH becomes low (Fig 4). As such, it appears that influenza

506 transmission rate increases monotonically with decreasing AH, leading to a single epidemic  
507 each year in the winter in temperate regions.

508

509         When there are multiple strains co-circulating, individuals who recover from  
510 infection gain specific immunity against the infecting strain and may remain susceptible to  
511 other influenza strains in co-circulation either during the same or subsequent epidemics. In  
512 this study, we combined data from all three co-circulating influenza viruses and, as such,  
513 our estimated duration of immunity, without distinguishing specific strains, was relatively  
514 short (~1–1.5 years). In comparison, the AH/T/Strain model which modeled H3N2 and  
515 H1N1/B epidemics separately, estimated a longer immunity period (1.5–2.5 years).  
516 Nevertheless, either estimate is quite low compared to the duration an influenza clade in  
517 circulation (1–10 years). Therefore, we note that the short immunity duration estimated  
518 here is more to capture the frequent influenza epidemics in Hong Kong. For locations with  
519 less frequent influenza epidemics, re-estimating the immunity duration per local epidemic  
520 data is warranted.

521

522         We recognize several limitations of our study. First, although our models fit the  
523 observations in Hong Kong well and provide support to the role of AH and temperature on  
524 influenza transmission, it is important to note that further laboratory and epidemiologic  
525 works are needed to establish a causal relationship. Second, while we accounted for multi-  
526 strain co-circulation to some extent (e.g., the AH/T/Short and the AH/T/Strain model), our  
527 models are highly simplified and do not distinguish the different epidemiological  
528 characteristics for H3N2, H1N1, and B; as such, our estimate of the immunity period may  
529 not reflect the true value. Third, for model simplicity, we did not model the interactions  
530 between (sub)types, which can modify the association with climate variables [41]. Future  
531 research is necessary to explore the impact of co-circulation, as a reasonable inclusion of  
532 multiple influenza (sub)types may be more appropriate than combining all strains. Fourth,  
533 as a first step, here we combined all influenza viruses without separating influenza by  
534 subtype or type. Previous studies have reported differential responses of different  
535 influenza strains to climate variables [41]. Future work could also model the impact of

536 climate variables for each influenza virus separately to examine such potential differences  
537 and the impact on influenza epidemic dynamics at the population level.

538

539 Our study also sidestepped several key factors that may shape influenza transmission  
540 dynamics, in particular, age, vaccination, and seasonal changes in contact patterns. Due to  
541 a lack of age-specific incidence data, we did not include age structure in our models.  
542 Vaccination rate in Hong Kong has increased in recent years, particularly among children  
543 aged <12 years and adults 65 years or older, due to vaccination subsidy provided to these  
544 age groups from 2008 onwards [42-44]. For instance, vaccination rate among children aged  
545 <12 years increased from 9.7% in 2011/12 to 55.4% in 2018/19; and vaccination rate  
546 among adults 65+ increased from 31.7% in 2011/12 to 43.6% in 2018/19 [45, 46]. These  
547 increases in vaccination coverage may in part explain the apparent decreases in ILI+ in  
548 recent years; a one-sided *t*-test indicated that the yearly ILI+ during 2011-2018 were  
549 significantly lower than years before 2009 (i.e., excluding the 2009 pandemic period;  
550  $p=0.009$ ). However, we do not have detailed data on vaccination rate nor vaccine efficacy  
551 over the entire study period in order to account for the impact of vaccination. Further,  
552 seasonal changes in contact patterns could also contribute to the observed seasonal  
553 influenza epidemic dynamics in Hong Kong. For instance, during a hot, humid summer,  
554 people may spend more time indoors and thus create additional opportunities for onward  
555 transmission to occur. Similar increases of indoor contact and transmission could occur  
556 during colder days in the winter. As such, the increased transmission under highly humid  
557 conditions in the summer or colder-drier conditions in the winter may be in part due to  
558 increased contact indoors, in addition to the higher survival rate of influenza viruses under  
559 these environmental conditions as shown in laboratory studies [15, 16, 39]. Our modeling  
560 here is not able to tease this apart. Future work is warranted to incorporate these  
561 additional factors that may further improve understanding of influenza transmission  
562 dynamics in tropical and subtropical climates. Nevertheless, we note that, all climate  
563 forcing models tested here are subject to the same limitations discussed above. Thus, the  
564 relative performance of the models and our general findings regarding key climate drivers  
565 still hold.

566

567 In summary, we have developed a simple mechanistic model incorporating the impact  
568 of AH and temperature on influenza transmission that is able to recreate the long-term  
569 influenza epidemic dynamics in Hong Kong, a subtropical city with highly diverse epidemic  
570 patterns. Past work has demonstrated that, incorporating information on AH into  
571 mechanistic influenza models significantly improved model fit and forecast accuracy in  
572 temperate regions [11]. Given that forecasts in the tropics and subtropics tend to be  
573 substantially less accurate than forecasts in temperate regions [36], the climate forcing  
574 model developed here could support a better understanding of climatic drivers of influenza  
575 transmission in these regions. Future work could incorporate this model into a SIRS model-  
576 forecast system to improve forecast accuracy in the tropics and subtropics to aid public  
577 health and medical workers in better anticipating influenza transmission in forthcoming  
578 weeks.

579

#### 580 **Acknowledgements:**

581 We thank the Hong Kong Center for Health Protection for providing data on sentinel  
582 surveillance and laboratory surveillance for influenza. We also thank Columbia University  
583 Mailman School of Public Health for access to high performance computing. **Funding:** HY  
584 and WY were supported by the NIH (AI135926 and ES009089). SCK was supported by the  
585 NIH (T32ES023770 and F31AI138410). EHYL and BJC were supported by the Theme-based  
586 Research Scheme project no. T11-712/19-N, the University Grants Committee of the Hong  
587 Kong Government.

588

589 **Conflict of Interest:** BJC reports receipt of honoraria from Roche and Sanofi. The authors  
590 declare that they have no other potential competing interests.

591

#### 592 **References:**

- 593 1. World Health Organization. *Influenza (Seasonal)*. 2018; Available from:  
594 [https://www.who.int/en/news-room/fact-sheets/detail/influenza-\(seasonal\)](https://www.who.int/en/news-room/fact-sheets/detail/influenza-(seasonal)).
- 595 2. Wong, C.M., et al., *Influenza-Associated Hospitalization in a Subtropical City*. PLoS  
596 Medicine, 2006. 3(4): p. e121-e121.

- 597 3. Ng, S. and A. Gordon, *Influenza Burden and Transmission in the Tropics*. Current  
598 Epidemiology Reports, 2015. **2**(2): p. 89-100.
- 599 4. Chretien, J.-P., et al., *Influenza Forecasting in Human Populations: A Scoping Review*.  
600 PLoS ONE, 2014. **9**(4): p. e94130-e94130.
- 601 5. Nsoesie, E.O., et al., *A systematic review of studies on forecasting the dynamics of  
602 influenza outbreaks*. 2014, Blackwell Publishing. p. 309-316.
- 603 6. Cummings, M.J., et al., *Epidemiologic and spatiotemporal Characterization of  
604 influenza and severe acute respiratory infection in Uganda, 2010-2015*. Annals of the  
605 American Thoracic Society, 2016. **13**(12): p. 2159-2168.
- 606 7. Soebiyanto, R.P., et al., *The Role of Temperature and Humidity on Seasonal Influenza  
607 in Tropical Areas: Guatemala, El Salvador and Panama, 2008-2013*. PLoS ONE, 2014.  
608 **9**(6): p. e100659-e100659.
- 609 8. Yang, L., et al., *Influenza associated mortality in the subtropics and tropics: Results  
610 from three Asian cities*. Vaccine, 2011. **29**(48): p. 8909-8914.
- 611 9. Tamerius, J., et al., *Global influenza seasonality: Reconciling patterns across temperate  
612 and tropical regions*. Environmental Health Perspectives, 2011. **119**(4): p. 439-445.
- 613 10. Bloom-Feshbach, K., et al., *Latitudinal Variations in Seasonal Activity of Influenza and  
614 Respiratory Syncytial Virus (RSV): A Global Comparative Review*. PLoS ONE, 2013.  
615 **8**(2): p. e54445-e54445.
- 616 11. Shaman, J. and M. Kohn, *Absolute humidity modulates influenza survival,  
617 transmission, and seasonality*. Proceedings of the National Academy of Sciences of  
618 the United States of America, 2009. **106**(9): p. 3243-3248.
- 619 12. Shaman, J., et al., *Absolute humidity and the seasonal onset of influenza in the  
620 continental United States*. PLoS Biology, 2010. **8**(2).
- 621 13. Shek, L.P.-C. and B.-W. Lee, *Epidemiology and seasonality of respiratory tract virus  
622 infections in the tropics*. Paediatric Respiratory Reviews, 2003. **4**(2): p. 105-111.
- 623 14. Tamerius, J.D., et al., *Environmental Predictors of Seasonal Influenza Epidemics across  
624 Temperate and Tropical Climates*. PLoS Pathogens, 2013. **9**(3).
- 625 15. Lowen, A.C. and J. Steel, *Roles of Humidity and Temperature in Shaping Influenza  
626 Seasonality*. Journal of Virology, 2014. **88**(14): p. 7692-7695.

- 627 16. Yang, W., S. Elankumaran, and L.C. Marr, *Relationship between Humidity and*  
628 *Influenza A Viability in Droplets and Implications for Influenza's Seasonality*. PLoS  
629 ONE, 2012. **7**(10): p. 1-8.
- 630 17. Moura, F.E.A., et al., *Seasonality of Influenza in the Tropics: A Distinct Pattern in*  
631 *Northeastern Brazil*. 2009. p. 180-183.
- 632 18. Lutwama, J.J., et al., *Clinic-and hospital-based sentinel influenza surveillance, Uganda*  
633 *2007-2010*. Journal of Infectious Diseases, 2012. **206**(SUPPL.1).
- 634 19. Mahamat, A., et al., *Climatic drivers of seasonal influenza epidemics in French Guiana,*  
635 *2006-2010*. Journal of Infection, 2013. **67**(2): p. 141-147.
- 636 20. Deyle, E.R., et al., *Global environmental drivers of influenza*. Proceedings of the  
637 National Academy of Sciences of the United States of America, 2016. **113**(46): p.  
638 13081-13086.
- 639 21. Carrat, F. and A. Flahault, *Influenza vaccine: The challenge of antigenic drift*. 2007. p.  
640 6852-6862.
- 641 22. Liu, M., et al., *Antigenic Patterns and Evolution of the Human Influenza A (H1N1)*  
642 *Virus*. Scientific Reports, 2015. **5**.
- 643 23. Smith, D.J., et al., *Mapping the antigenic and genetic evolution of influenza virus*.  
644 Science, 2004. **305**(5682): p. 371-376.
- 645 24. Couch, R.B. and J.A. Kasel, *Immunity to Influenza in Man*. Annual Review of  
646 Microbiology, 1983. **37**(1): p. 529-549.
- 647 25. Greene, S.K., E.L. Ionides, and M.L. Wilson, *Patterns of Influenza-associated Mortality*  
648 *among US Elderly by Geographic Region and Virus Subtype, 1968–1998*. American  
649 Journal of Epidemiology, 2006. **163**(4): p. 316-326.
- 650 26. *Climatological Information Services / Hong Kong Observatory(HKO) / Climate*. [cited  
651 2018; Available from: <https://www.hko.gov.hk/en/cis/climat.htm>.
- 652 27. Wallace, J. and P. Hobbs, *Atmospheric Science: An Introductory survey*. 2nd Edition  
653 ed. 2006, New York: Academic Press. 504.
- 654 28. Census and Statistics Department HKSAR, *Fertility Trend in Hong Kong, 1981 to*  
655 *2017*. Hong Kong Monthly Digest of Statistics, 2018.

- 656 29. Finkenstadt, B.F. and B.T. Grenfell, *Time Series Modelling of Childhood Diseases: A*  
657 *Dynamical Systems Approach*. 2000. p. 187-205.
- 658 30. Roper, W.L., et al., *Serum Cross-Reactive Antibody Response to a Novel Influenza A*  
659 *(H1N1) Virus After Vaccination with Seasonal Influenza Vaccine*. 2009.
- 660 31. Miller, E., et al., *Incidence of 2009 pandemic influenza A H1N1 infection in England: a*  
661 *cross-sectional serological study*. *The Lancet*, 2010. **375**(9720): p. 1100-1108.
- 662 32. Yang, W., E.H.Y. Lau, and B.J. Cowling, *Dynamic interactions of influenza viruses in*  
663 *Hong Kong during 1998-2018*. *PLoS Comput Biol*, 2020. **16**(6): p. e1007989.
- 664 33. Brown, J.D., et al., *Avian influenza virus in water: Infectivity is dependent on pH,*  
665 *salinity and temperature*. *Veterinary Microbiology*, 2009. **136**(1-2): p. 20-26.
- 666 34. Chowell, G., M.A. Miller, and A.N.D.C.V. Ib, *Seasonal influenza in the United States,*  
667 *France, and Australia: transmission and prospects for control*.
- 668 35. Harper, G.J., *Airborne micro-organisms: survival tests with four viruses*. *Epidemiology*  
669 *and Infection*, 1961. **59**(4): p. 479-486.
- 670 36. Kramer, S.C. and J. Shaman, *Development and validation of influenza forecasting for*  
671 *64 temperate and tropical countries*. *PLoS Computational Biology*, 2019. **15**(2): p.  
672 e1006742-e1006742.
- 673 37. Mills, C.E., J.M. Robins, and M. Lipsitch, *Transmissibility of 1918 pandemic influenza*.  
674 *Nature*, 2004. **432**(7019): p. 904-906.
- 675 38. Yang, W., et al., *Forecasting Influenza Epidemics in Hong Kong*. *PLoS Computational*  
676 *Biology*, 2015. **11**(7): p. 1-17.
- 677 39. Lowen, A.C., et al., *Influenza Virus Transmission Is Dependent on Relative Humidity*  
678 *and Temperature*. *PLoS Pathogens*, 2007. **3**(10): p. e151-e151.
- 679 40. Lowen, A.C., et al., *High Temperature (30°C) Blocks Aerosol but Not Contact*  
680 *Transmission of Influenza Virus*. *Journal of virology*, 2008. **82**(11): p. 5650-5652.
- 681 41. Yang, W., et al., *Dynamics of influenza in tropical Africa: Temperature, humidity, and*  
682 *co-circulating (sub)types*. *Influenza and other Respiratory Viruses*, 2018. **12**(4): p.  
683 446-456.
- 684 42. Hong Kong's Department of Health, *2008-2009 Annual Report*.
- 685 43. Hong Kong's Department of Health, *Vaccination subsidy schemes launched*. 2009.

- 686 44. Hong Kong's Department of Health, *Subsidised vaccination for young children and*  
687 *elderly*. 2009.
- 688 45. Legislative Council of the Hong Kong Special Administrative Region of the People's  
689 Republic of China. *Seasonal Influenza Vaccination*. 2018 [cited 2021; Available from:  
690 [https://www.legco.gov.hk/research-publications/english/essentials-1718ise06-](https://www.legco.gov.hk/research-publications/english/essentials-1718ise06-seasonal-influenza-vaccination.htm)  
691 [seasonal-influenza-vaccination.htm](https://www.legco.gov.hk/research-publications/english/essentials-1718ise06-seasonal-influenza-vaccination.htm).
- 692 46. Centre for Health Protection. *Statistics on Vaccination Programmes in the Past 3*  
693 *years*. 2020 [cited 2021; Available from:  
694 <https://www.chp.gov.hk/en/features/102226.html>.  
695

### Table Captions:

**Table 1.** Descriptions and estimates of the parameter ranges. The range estimates are the 95% highest density intervals for parameters, obtained after two rounds of parameter selection from the initial parameter range (shown in parentheses).

696 **Table 2.** The model performance ranks for each comparison metric using training and  
697 testing data. The rankings are determined by the model's absolute mean rank differences  
698 with the best-ranked model. Different rankings between models indicate significantly  
699 different absolute mean ranks (i.e.,  $p$ -value $<0.007$ ). The mean value of the corresponding  
700 metric is shown in the parentheses.

### Figure Captions:

**Fig 1.** Influenza epidemics observed in Hong Kong during 1998-2018 and the corresponding mean daily temperature and AH. Upper panel: stacked barplot of the weekly ILI+ incidence time series. Segments of the bar represent different virus (sub)types circulating during the week. Lower panel: daily mean temperature and specific humidity (a measure of AH) observed during 1998-2018.



701 **Fig 2.** Model performance. Boxes and whiskers show the median (thick horizontal lines),  
702 interquartile range and 95% CI of RMSE (1<sup>st</sup> row), average RMSE (2<sup>nd</sup> row), correlation (3<sup>rd</sup>  
703 row) and average correlation (4<sup>th</sup> row) of the top 1000 parameter combinations for each  
704 model, during the training (red) and testing (green) period, separately.

705

706 **Fig 3.** Top10 model fits for three climate forcing models: AH/T (A), AH/T/Vary (B), and  
707 AH/T/Strain (C). Black crosses show observed ILI+; the colored lines run through the  
708 crosses are the top10 model estimates. The vertical dash line indicates a pandemic (2009).  
709 The shaded region represents testing years (2013-2018), while the rest are the training  
710 years.

**Fig 4.** Estimated relationship between influenza transmission with AH and temperature.  
We use the basic reproductive number ( $R_0$ ) to represent the level of influenza transmission.  
Each point shows the estimated  $R_0$  at different specific humidity, a measure of AH, (and  
temperature if included) calculated per the AH/T model (left) or the AH model (right)  
using the top 10 parameter combinations for the corresponding model. For the AH/T  
model (left panel), the color of the point shows the concurrent temperature included in the  
model to moderate the relationship between  $R_0$  and specific humidity.

711 **Fig 5.** Comparison of the reproductive numbers estimated by the AH/T model with  
712 laboratory observed virus survival rate and transmission rate in guinea pigs. Left panel  
713 plots the viral survival rate (A) and transmission rate (C) against  $R_0$  calculated using Eqn 3  
714 and best-fit parameters for the AH/T model. Right panel plots the viral survival rate (B)  
715 and transmission rate (D) against  $R_e$ , where  $R_e$  is calculated as  $R_0$  multiplied by the  
716 estimated mean population susceptibility during the study period. The grey vertical line  
717 indicates where  $R_e = 1$ . The viral survival data came from Harper 1961 [35] and  
718 transmission rate data came from Lowen et al. 2007 and 2008 [39, 40].

### Supplementary Table Captions

719 **Table S1.** The model performance ranks for each comparison metric using training and  
720 testing data (excluding the 2009 pandemic). The rankings are determined by the model's

721 absolute mean rank differences with the best-ranked model. Different rankings between  
722 models indicate significantly different absolute mean ranks (i.e.,  $p$ -value $<0.007$ ). The mean  
723 value of the corresponding metric is shown in the parentheses.

### Supplementary Figure Captions

724 **Fig S1.** The change of mean ILI+ of each influenza (sub)type in circulation within a year.  
725 The mean ILI+ took average of the ILI+ observed in Hong Kong over 21 years (1998-2018).

726 **Fig S2.** Top10 model fits for Null1 (A), Null2 (B), and AH (C) model. Black crosses show  
727 observed ILI+; the colored lines run through the crosses show the top 10 model estimates.  
728 The vertical dash line indicates the onset of the 2009 pandemic. The shaded regions  
729 indicate testing years (2013-2018); and the rest are the training years.

730 **Fig S3.** Top10 model fits for the observed seasonality (averaged over training or testing  
731 years) for the seven models: Null1 (A), Null2 (B), AH (C), AH/T (D), AH/T/Short(E)  
732 AH/T/Vary (F) and AH/T/Strain (G). Black crosses show observed averaged ILI+ over  
733 training or testing years; colored lines run through the crosses show the top10 model  
734 estimates. Left panels show model fits for the training period and the right panels show  
735 model fits for the testing period.

736

737 **Tables:**

738 **Table 1.** Descriptions and estimates of the parameter ranges. The estimated parameter ranges are the 95% highest density  
 739 intervals, obtained after two rounds of parameter selection from the initial ranges (shown in parentheses).

| <i>Parameter and sources of initial ranges</i> | Parameter Description                                                                                                         | Null1                  | Null2                  | AH                       | AH/T                     | AH/T/<br>Strain          | AH/T/<br>Short           | AH/T/<br>Vary            |
|------------------------------------------------|-------------------------------------------------------------------------------------------------------------------------------|------------------------|------------------------|--------------------------|--------------------------|--------------------------|--------------------------|--------------------------|
| $R_0$<br>[12, 34, 36-38]                       | The basic reproductive number (i.e., the average number of cases caused by a primary case in a fully susceptible population). | 2.06-2.11<br>(1.0-3.0) | NA                     | NA                       | NA                       | NA                       | NA                       | NA                       |
| $R_{0mx}$<br>[12, 34, 36-38]                   | The theoretical value of $R_0$ at $q = q_{min}$ and $q = q_{max}$ , when $T = T_c$                                            | NA                     | 2.52-2.69<br>(1.5-3.0) | 1.95-2.50<br>(1.5-3.0)   | 2.34-2.93<br>(1.5-3.0)   | 2.38-2.88<br>(1.5-3.0)   | 2.13-2.67<br>(1.5-3.0)   | 2.27-2.66<br>(1.5-3.0)   |
| $R_{odiff}$                                    | The difference between $R_{0max}$ , and $R_0$ at $q = q_{mid}$ .                                                              | NA                     | 1.10-1.20<br>(0.6-1.2) | 0.60-1.18<br>(0.6-1.2)   | 0.86-1.18<br>(0.6-1.2)   | 0.70-1.17<br>(0.6-1.2)   | 0.65-1.09<br>(0.6-1.2)   | 0.72-1.12<br>(0.6-1.2)   |
| $q_{min}$ (g/kg)                               | The absolute humidity value at which $R_0 = R_{0max}$ when $T = T_c$ ; the minimum value of absolute humidity permitted.      | NA                     | NA                     | 7.7-8.0<br>(2.0-8.0)     | 2.2-4.0<br>(2.0-8.0)     | 2.0-3.6<br>(2.0-8.0)     | 2.1-3.4<br>(2.0-8.0)     | 2.1-3.7<br>(2.0-8.0)     |
| $q_{max}$ (g/kg)                               | The absolute humidity value at which $R_0 = R_{0max}$ when $T = T_c$ ; the maximum value of absolute humidity permitted.      | NA                     | NA                     | 22.6-23.0<br>(16.0-23.0) | 17.0-20.0<br>(16.0-23.0) | 17.0-19.0<br>(16.0-23.0) | 18.0-19.0<br>(16.0-23.0) | 17.0-19.0<br>(16.0-23.0) |
| $q_{mid}$ (g/kg)                               | The absolute humidity value at which $R_0 = R_{0max} - R_{odiff}$ .                                                           | NA                     | NA                     | 12.6-13.0<br>(10.0-13.0) | 10.2-11.3<br>(10.0-13.0) | 10.2-12.5<br>(10.0-13.0) | 10-12.2<br>(10.0-13.0)   | 10.2-12.6<br>(10.0-13.0) |

|                                    |                                                                                                                                                   |                       |                            |                         |                        |                        |                        |                            |
|------------------------------------|---------------------------------------------------------------------------------------------------------------------------------------------------|-----------------------|----------------------------|-------------------------|------------------------|------------------------|------------------------|----------------------------|
| $T_c$ (°C)<br>[33, 35]             | The cutoff temperature above which temperature negatively impacts $R_0$ .                                                                         | NA                    | NA                         | NA                      | 20.24-24.0<br>(20-25)  | 20.04-24.46<br>(20-25) | 20.16-24.47<br>(20-25) | 20.52-23.87<br>(20-25)     |
| $T_{diff}$ (°C)                    | A parameter that, when subtracted from $T_c$ , yields the minimum temperature permitted as a model input.                                         | NA                    | NA                         | NA                      | 0.40-5.09<br>(0-15)    | 1.28-7.05<br>(0-15)    | 1.34-5.31<br>(0-15)    | 0.77-4.46<br>(0-15)        |
| $T_{exp}$                          | An exponent determining the strength of the impact of temperature on $R_0$ .                                                                      | NA                    | NA                         | NA                      | 0.95-1.54<br>(0.5-2.0) | 0.67-1.49<br>(0.5-2.0) | 0.78-1.33<br>(0.5-2.0) | 0.78-1.34<br>(0.5-2.0)     |
| $D$ (days)<br>[12, 30, 31, 38]     | The duration of influenza infection.                                                                                                              | 3.35-3.71<br>(2-5)    | 4.68-4.98<br>(2-5)         | 2.56-4.99<br>(2-5)      | 4.05-4.99<br>(2-5)     | 3.50-4.70<br>(2-5)     | 3.87-4.98<br>(2-5)     | 3.67-4.90<br>(2-5)         |
| $L$ (days)<br>[12, 22, 23, 36, 38] | The duration of influenza immunity; in the AH/T/Vary model, the duration of immunity among those who do not lose immunity at an accelerated rate. | 369-391<br>(365-3650) | 421-607<br>(365-3650)      | 1298-2860<br>(365-3650) | 376-489<br>(365-3650)  | 536-838<br>(365-3650)  | 310-451<br>(183-548)   | 374-567<br>(365-3650)      |
| $L_s$ (days)                       | The duration of influenza immunity among those with accelerated immunity loss in the AH/T/Vary model.                                             | NA                    | NA                         | NA                      | NA                     | NA                     | NA                     | 82-336<br>(30-365)         |
| $\rho$                             | The proportion of the population with accelerated immunity loss in the AH/T/Vary model.                                                           | NA                    | NA                         | NA                      | NA                     | NA                     | NA                     | 0.0006-0.29<br>(0-0.5)     |
| $S_0$                              | The number of people susceptible to influenza at the beginning of the model run.                                                                  | 48.78%<br>-<br>76.16% | 78.77%-79.98%<br>(40%-80%) | 71.58%<br>-<br>79.71%   | 59.27%<br>-<br>76.79%  | 57.03%<br>-<br>69.86%  | 67.03%<br>-<br>77.61%  | 66.02%-79.36%<br>(40%-80%) |

|       |                                                                                      | (40%-80%)              |                       | (40%-80%)              | (40%-80%)              | (40%-80%)              | (40%-80%)             |                        |
|-------|--------------------------------------------------------------------------------------|------------------------|-----------------------|------------------------|------------------------|------------------------|-----------------------|------------------------|
| $I_0$ | The number of people infected at the beginning of the model run.                     | 520-1489<br>(500-1500) | 534-851<br>(500-1500) | 611-1161<br>(500-1500) | 515-1052<br>(500-1500) | 512-1105<br>(500-1500) | 515-900<br>(500-1500) | 519-1256<br>(500-1500) |
| $p$   | An exponent to allow for imperfect mixing. Homogenous mixing occurs when $p = 1.0$ . | 0.97                   | 0.97                  | 0.97                   | 0.97                   | 0.97                   | 0.97                  | 0.97                   |

740

741 **Table 2.** The model performance ranks for each comparison metric using training and  
 742 testing data. The rankings are determined by the model's absolute mean rank differences  
 743 with the best-ranked model. Different rankings between models indicate significantly  
 744 different absolute mean ranks (i.e., p-value<0.007). The mean value of the corresponding  
 745 metric is shown in the parenthesis.

|       | Models           | Null1          | Null2       | AH          | AH/T        | AH/T/<br>Strain | AH/T/<br>Short | AH/T/<br>Vary |
|-------|------------------|----------------|-------------|-------------|-------------|-----------------|----------------|---------------|
| Train | full.RMSE        | 6<br>(772)     | 4<br>(675)  | 7<br>(804)  | 1<br>(611)  | 6<br>(720)      | 1<br>(604)     | 1<br>(611)    |
|       | avg.RMSE         | 6<br>(422)     | 5<br>(349)  | 7<br>(541)  | 1<br>(243)  | 4<br>(310)      | 1<br>(240)     | 1<br>(249)    |
|       | full.Correlation | 7<br>(0.12)    | 5<br>(0.43) | 6<br>(0.32) | 2<br>(0.53) | 4<br>(0.50)     | 1<br>(0.55)    | 2<br>(0.52)   |
|       | avg.Correlation  | 7<br>(-0.16)   | 5<br>(0.73) | 6<br>(0.62) | 3<br>(0.87) | 1<br>(0.88)     | 1<br>(0.89)    | 3<br>(0.87)   |
|       | Average rank     | 6.5            | 4.75        | 6.5         | 1.75        | 3.75            | 1              | 1.75          |
| Test  | full.RMSE        | 6<br>(620)     | 3<br>(478)  | 5<br>(613)  | 2<br>(479)  | 7<br>(676)      | 3<br>(492)     | 1<br>(470)    |
|       | avg.RMSE         | 6<br>(434)     | 2<br>(237)  | 4<br>(422)  | 2<br>(249)  | 6<br>(476)      | 4<br>(274)     | 1<br>(228)    |
|       | full.Correlation | 7<br>(-0.0005) | 5<br>(0.49) | 6<br>(0.10) | 3<br>(0.54) | 1<br>(0.55)     | 1<br>(0.54)    | 4<br>(0.52)   |
|       | avg.Correlation  | 7<br>(-0.0007) | 5<br>(0.76) | 6<br>(0.11) | 1<br>(0.78) | 1<br>(0.78)     | 1<br>(0.79)    | 4<br>(0.78)   |
|       | Average rank     | 6.5            | 3.75        | 5.25        | 2           | 3.75            | 2.25           | 2.5           |

746

## Figures:

**Fig 1.** Influenza epidemics observed in Hong Kong during 1998-2018 and the corresponding mean daily temperature and AH. Upper panel: stacked barplot of the weekly ILI+ incidence time series. Segments of the bar represent different virus (sub)types circulating during the week. Lower panel: daily mean temperature and specific humidity (a measure of AH) observed during 1998-2018.

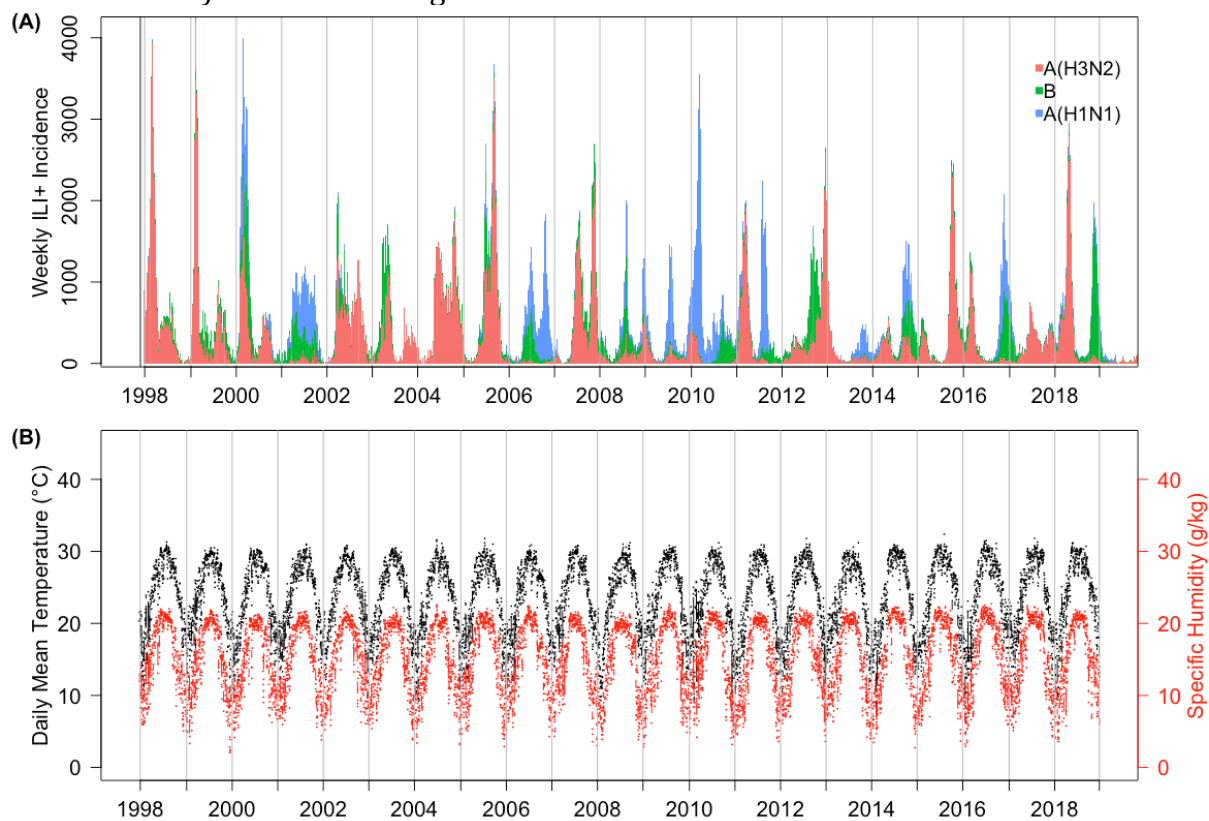

**Fig 2. Model performance.** Boxes and whiskers show the median (thick horizontal lines), interquartile range and 95% CI of RMSE (1<sup>st</sup> row), average RMSE (2<sup>nd</sup> row), correlation (3<sup>rd</sup> row) and average correlation (4<sup>th</sup> row) of the top 1000 parameter combinations for each model, during the training (red) and testing (green) period, separately.

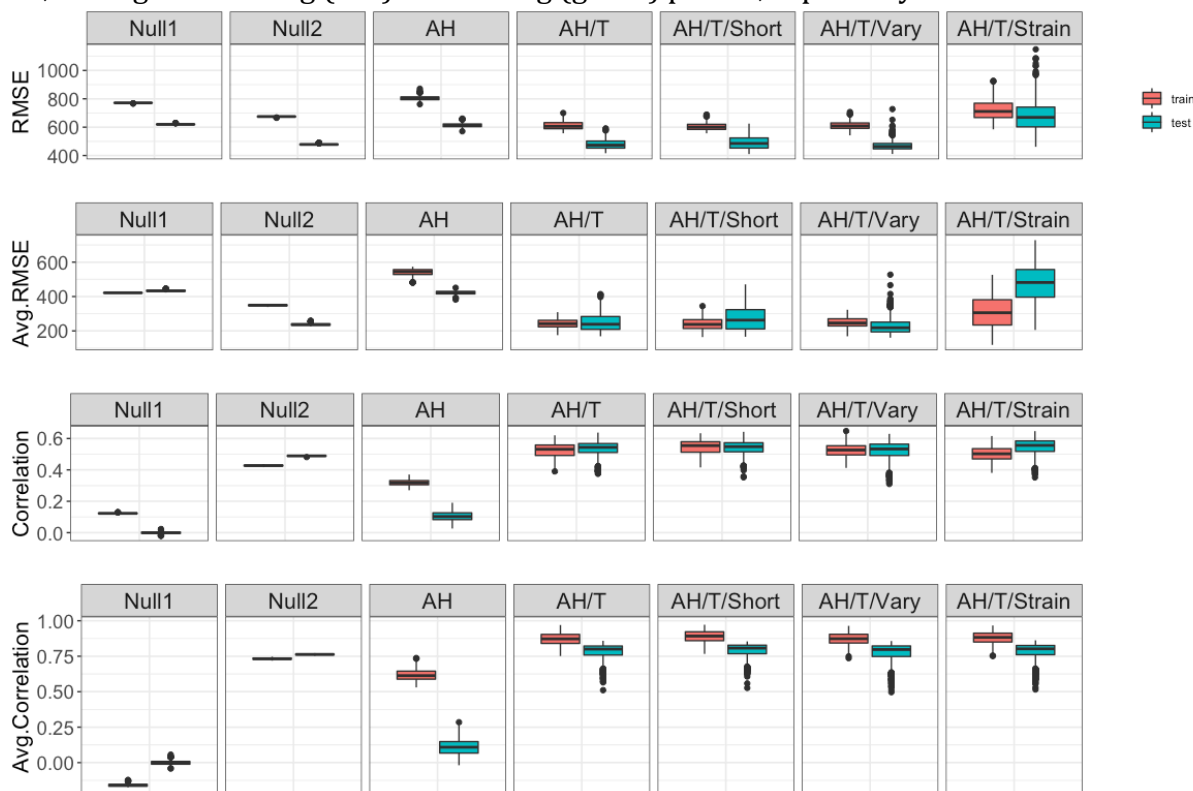



**Fig 3.** Top10 model fits for three climate forcing models: AH/T (A), AH/T/Vary (B), and AH/T/Strain (C). Black crosses show observed ILI+; the colored lines run through the crosses are the top10 model estimates. The vertical dash line indicates a pandemic (2009). The shaded region represents testing years (2013-2018), while the rest are the training years.

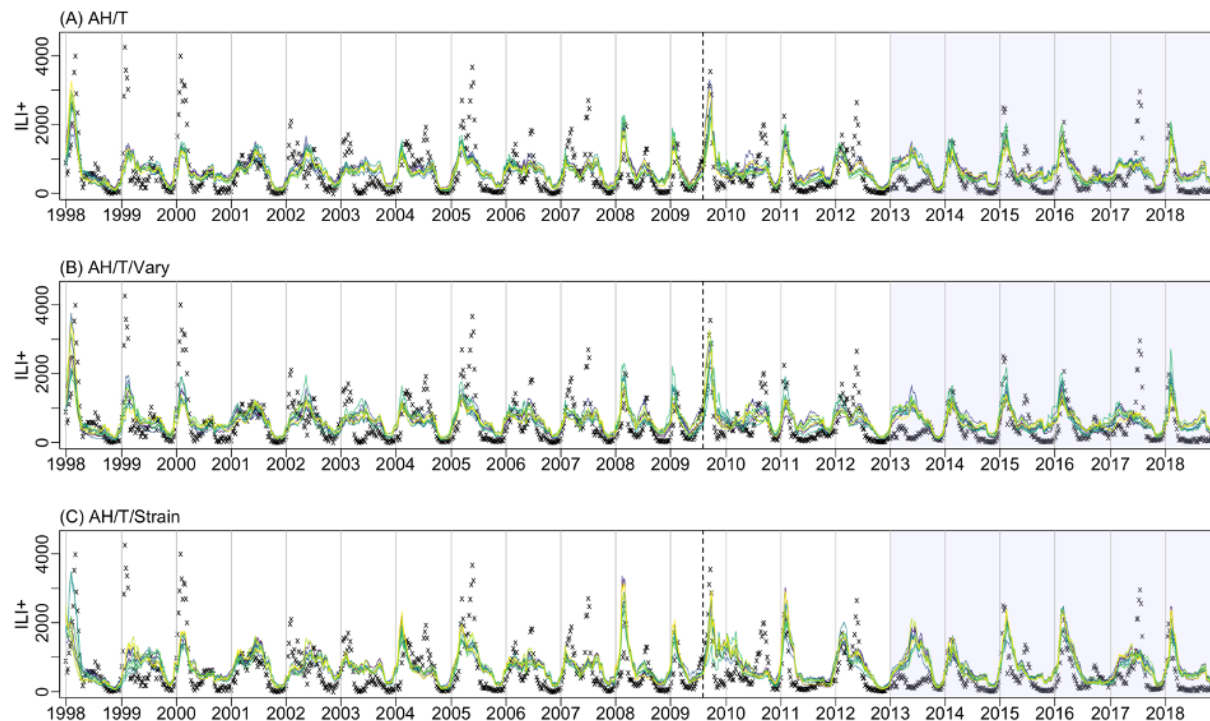

**Fig 4.** Estimated relationship between influenza transmission with AH and temperature. We use the basic reproductive number ( $R_0$ ) to represent the level of influenza transmission. Each point shows the estimated  $R_0$  at different specific humidity, a measure of AH, (and temperature if included) calculated per the AH/T model (left) or the AH model (right) using the top 10 parameter combinations for the corresponding model. For the AH/T model (left panel), the color of the point shows the concurrent temperature included in the model to moderate the relationship between  $R_0$  and specific humidity.

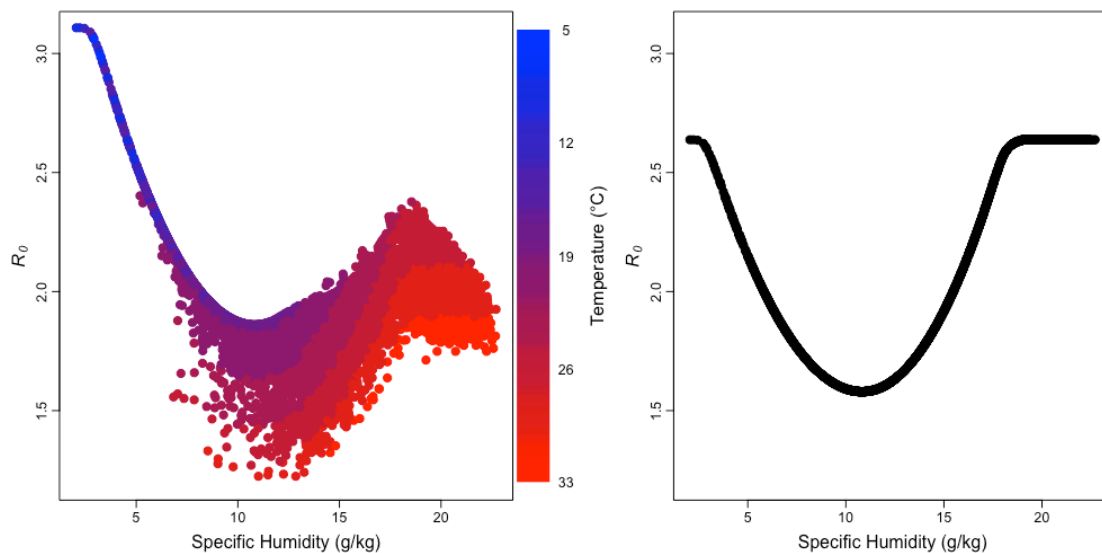

**Fig 5** Comparison of the reproductive numbers estimated by the AH/T model with laboratory observed virus survival rate and transmission rate in guinea pigs. Left panel plots the viral survival rate (A) and transmission rate (C) against  $R_0$  calculated using Eqn 3 and best-fit parameters for the AH/T model. Right panel plots the viral survival rate (B) and transmission rate (D) against  $R_e$ , where  $R_e$  is calculated as  $R_0$  multiplied by the estimated mean population susceptibility during the study period. The grey vertical line indicates where  $R_e = 1$ . The viral survival data came from Harper 1961 [35] and transmission rate data came from Lowen et al. 2007 and 2008 [39, 40].

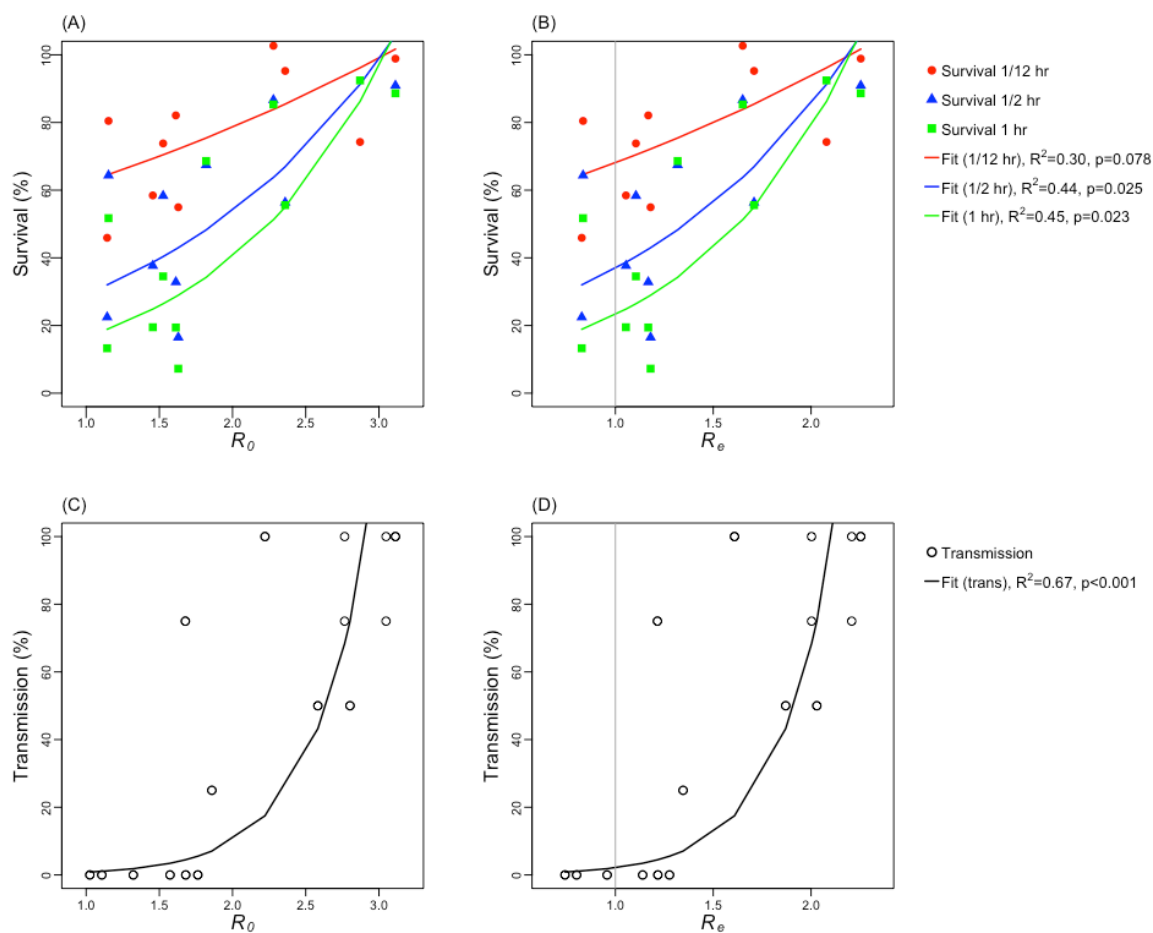

## Supporting Information

### Modeling influenza seasonality in tropics and subtropics

Haokun Yuan, Sarah Kramer, Eric H. Y. Lau, Benjamin J. Cowling, Wan Yang

This supplemental document includes 1) Preliminary data processing; and 2) Simulation methods and modeling details.

#### 1. Preliminary data processing

##### 1.1 Calculation of absolute humidity [1]

First, we calculated saturation vapor pressure as:

$$e_s(T) = e_s(T_0) \times e^{\frac{L}{R_v} \left( \frac{1}{T_0} - \frac{1}{T} \right)} \quad [\text{S4}]$$

where  $e_s(T)$  is the saturation vapor pressure at temperature  $T$  (in K),  $e_s(T_0)$  is the saturation vapor pressure at 273.15 K,  $L$  is the latent heat of evaporation for water,  $R_v$  is the gas constant for water vapor. We then computed vapor pressure at each time point as:

$$e = e_s(T) \left( \frac{RH}{100} \right) \quad [\text{S5}]$$

where  $RH$  represents relative humidity. We calculated the mixing ratio,  $mr$ , as:

$$mr = \frac{R_d}{R_v} \left( \frac{e}{p_0 - e} \right) \quad [\text{S6}]$$

where  $R_d$  is the gas constant for dry air and  $p_0$  is the atmospheric pressure at sea level. Finally, absolute humidity was calculated as:

$$AH = \frac{mr}{1 + mr} \quad [\text{S7}]$$

#### 2. Simulation methods and modeling details

##### 2.1 Stochastic Model Runs

Similar to the climate forcing model used to model influenza in temperate region by Shaman et al. [2], we constructed a stochastic Markov chain, where stochastic is introduced by the transition between states. The number of individuals moving from one state to another (i.e. susceptible to infected, infected to recovered) is random draw from a Poisson distribution with a rate determined by Eqn 1.

35  
36  
37  
38  
39  
40

2.2 Climate forcing model for temperate regions (Null2)  
The climate forcing model for temperate regions, first introduced by Shaman et al [2], assumes influenza transmission decreases monotonically with increasing absolute humidity. This relationship is modeled as:

$$R_0(t) = \exp(a \times q(t) + b) + R_{0min} \quad [S8]$$

41  
42  
43  
44  
45  
46

Where  $a = -180$ ,  $b = \log(R_{0max} - R_{0min})$ ,  $R_{0max}$  is the maximum daily basic reproductive number, while  $R_{0min}$  is the minimum daily basic reproductive number.

47  
48  
49  
50  
51

2.3 Climate forcing model for (sub)tropical regions (AH/T, AH/T/Short, AH/T/Vary, AH/T/Strain)  
Absolute humidity alone was proposed to have a bimodal effect on influenza transmission. And the formula can be written as follow:

$$R_0(t) = aq^2(t) + bq(t) + c \quad [S6]$$

52  
53  
54  
55

Values of  $a$ ,  $b$ , and  $c$  are defined as:

$$\left\{ \begin{array}{l} a = \frac{-b}{q_{max} + q_{min}} \\ b = \frac{(R_{0max} - (R_{0max} - R_{0diff})) (q_{max} + q_{min})}{(q_{max} - q_{mid})(q_{min} - q_{mid})} \\ c = (R_{0max} - R_{0diff}) - aq_{mid}^2 - bq_{mid} \end{array} \right. \quad [S7]$$

56  
57  
58

Given equation S6, the derivation of equation S7 is shown as below:

$$R_{0max} = aq_{min}^2 + bq_{min} + c \quad (1)$$

59

$$R_{0max} = aq_{max}^2 + bq_{max} + c \quad (2)$$

$$R_{0min} = aq_{mid}^2 + bq_{mid} + c \quad (3)$$

60  
61

Subtracting (1) from (2), we can get:

62  
63  
64

$$a(q_{max}^2 - q_{min}^2) + b(q_{max} - q_{min}) = 0$$

65 Rearrange the equation:

66 
$$a = -\frac{b}{q_{max} + q_{min}}$$

67  
68 Moreover, by subtracting (3) from (2), we can get:

69  
70 
$$R_{0_{max}} - R_{0_{min}} = a(q_{max}^2 - q_{mid}^2) + b(q_{max} - q_{mid})$$

71  
72 Plug in  $a$ :

73 
$$R_{0_{max}} - R_{0_{min}} = b \left[ (q_{max} - q_{mid}) - \frac{q_{max}^2 - q_{mid}^2}{q_{max} + q_{min}} \right]$$

74  
75 Move  $b$  to the left-hand side and rearrange:

76  
77 
$$b = \frac{(R_{0_{max}} - (R_{0_{max}} - R_{0_{diff}})) (q_{max} + q_{min})}{(q_{max} - q_{mid})(q_{min} - q_{mid})}$$

78  
79 Plug  $a$  and  $b$  into Eqn. S7:

80  
81 
$$c = (R_{0_{max}} - R_{0_{diff}}) - a q_{mid}^2 - b q_{mid}$$

82  
83  
84  
85

86 **Reference:**

- 87 1. Wallace J, Hobbs P. Atmospheric Science: An Introductory Survey. New York:  
88 Academic Press; 2006.  
89 2. Shaman J, Pitzer VE, Viboud C, Grenfell BT, Lipsitch M. Absolute Humidity and  
90 the Seasonal Onset of Influenza in the Continental United States. Ferguson NM,  
91 editor. PLoS Biol. 2010 Feb 23;8(2):e1000316.

92  
93  
94  
95  
96  
97

98 **Supplementary figures**

99 **Fig S1.** The change of mean ILI+ of each influenza (sub)type in circulation within a year.

100 The mean ILI+ took average of the ILI+ observed in Hong Kong over 21 years (1998-2018).

101

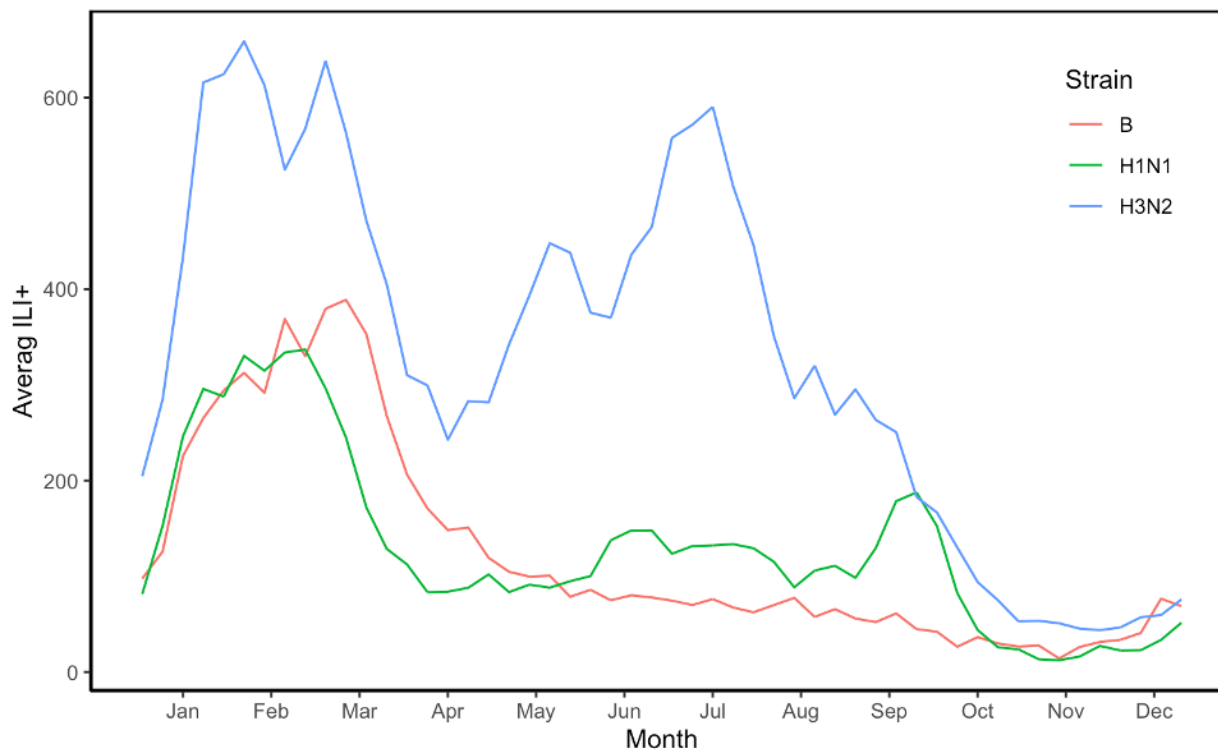

102  
103

104 **Fig S2.** Top10 model fits for Null1 (A), Null2 (B), and AH (C) model. Black crosses show  
105 observed ILI+; the colored lines run through the crosses show the top 10 model estimates.  
106 The vertical dash line indicates the onset of the 2009 pandemic. The shaded regions  
107 indicate testing years (2013-2018); and the rest are the training years.

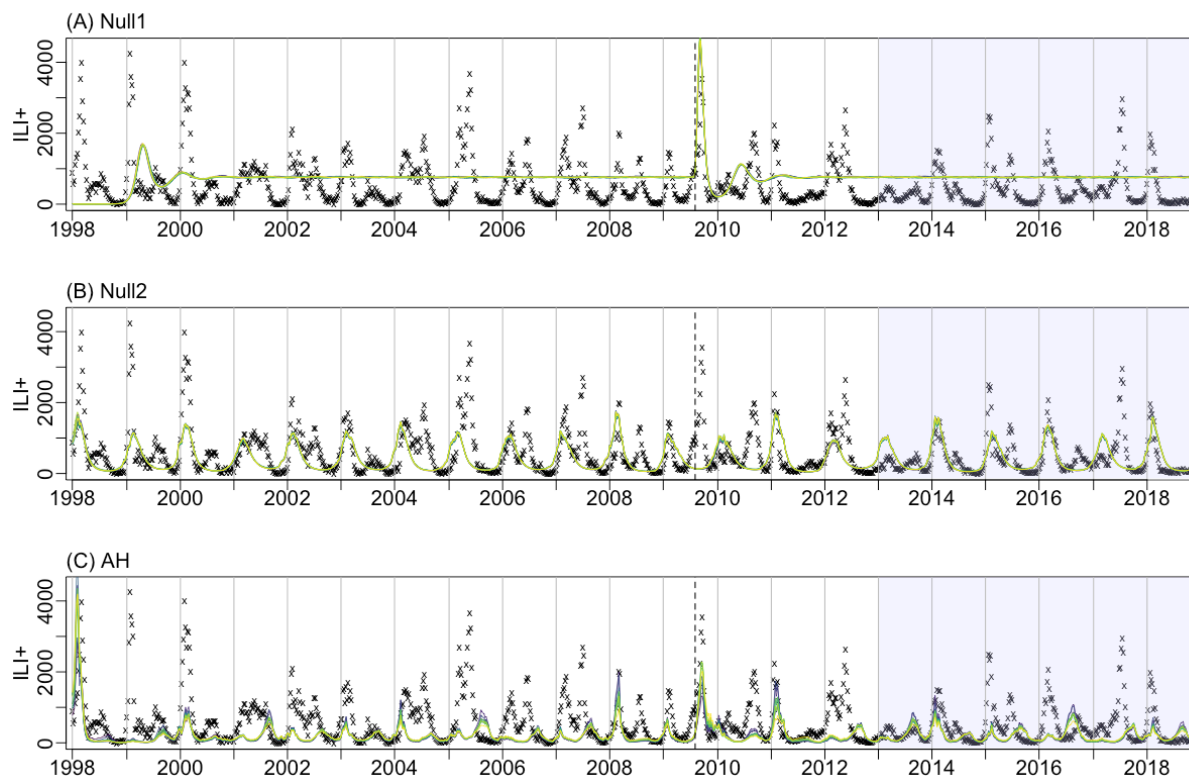

108  
109



110 **Fig S3.** Top10 model fits for the observed seasonality (averaged over training or testing  
111 years) for the seven models: Null1 (A), Null2 (B), AH (C), AH/T (D), AH/T/Short(E)  
112 AH/T/Vary (F) and AH/T/Strain (G). Black crosses show observed averaged ILI+ over  
113 training or testing years; the colored lines run through the crosses are the top10 model  
114 estimates. Left panels are the model fit towards training data, and the right panels plot the  
115 fit for testing.  
116

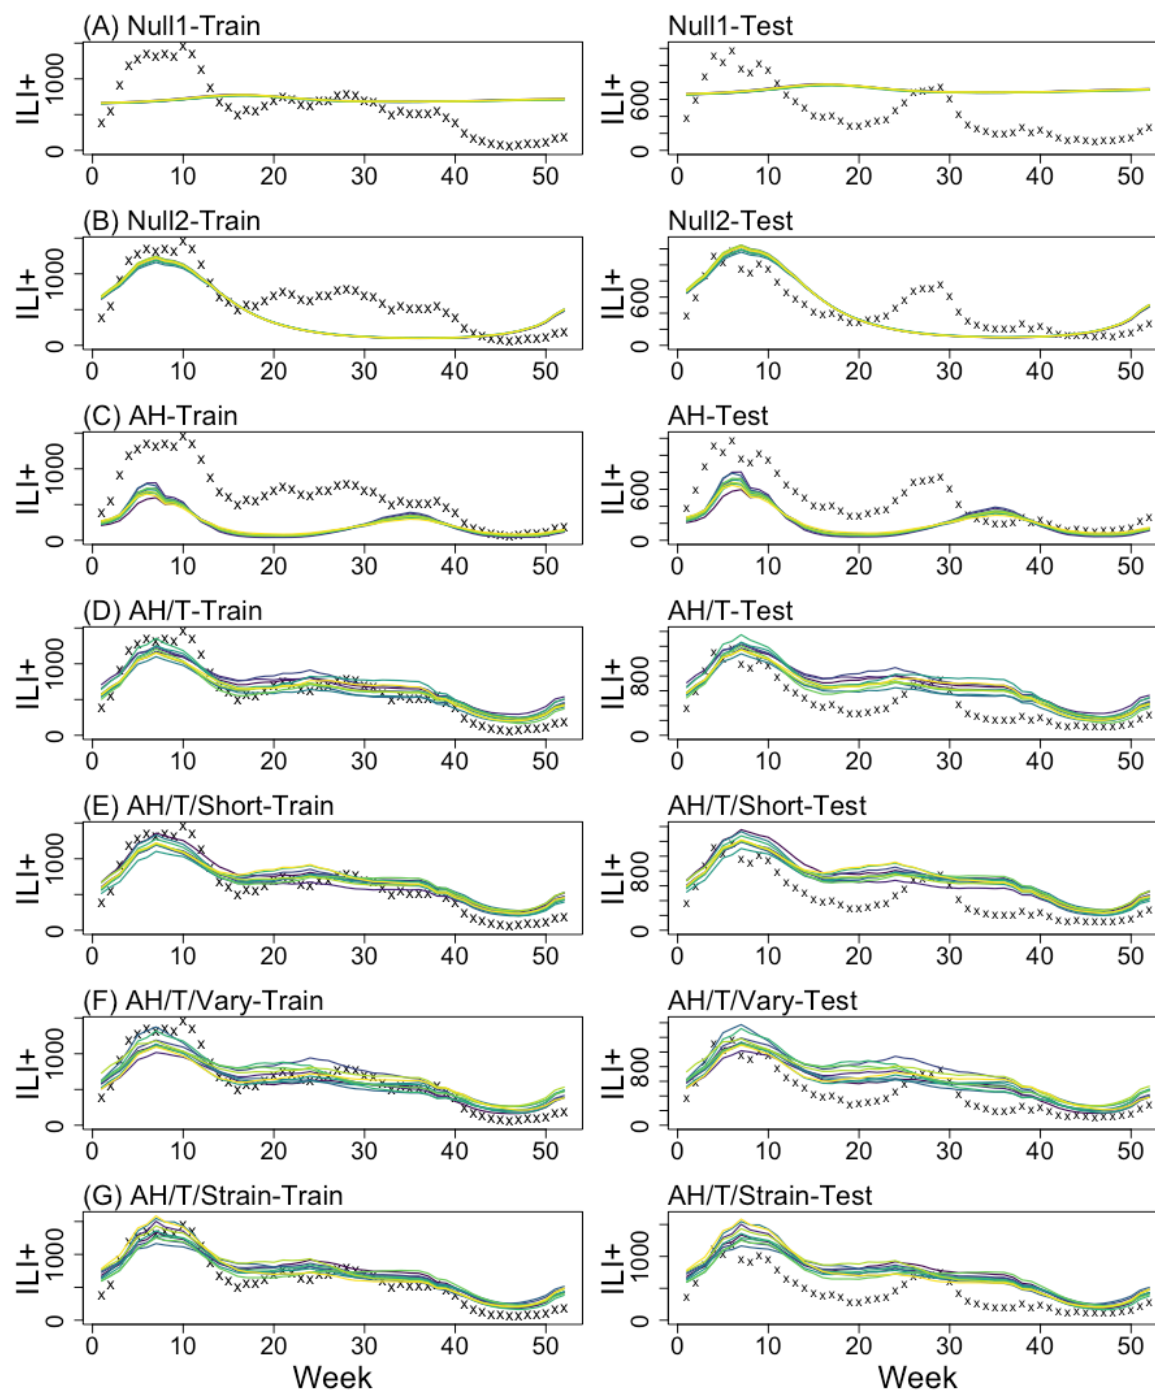

117

118 **Tables:**

119 **Table S1.** The model performance ranks for each comparison metric using training and  
 120 testing data (excluding the 2009 pandemic). The rankings are determined by the model's  
 121 absolute mean rank differences with the best-ranked model. Different rankings between  
 122 models indicate significantly different absolute mean ranks (i.e., p-value<0.007). The mean  
 123 value of the corresponding metric is shown in the parenthesis.

|       | Models           | Null1          | Null2       | AH          | AH/T        | AH/T/<br>Strain | AH/T/<br>Short | AH/T/<br>Vary |
|-------|------------------|----------------|-------------|-------------|-------------|-----------------|----------------|---------------|
| Train | full.RMSE        | 6<br>(781)     | 4<br>(644)  | 7<br>(821)  | 1<br>(606)  | 5<br>(701)      | 1<br>(602)     | 1<br>(612)    |
|       | avg.RMSE         | 6<br>(452)     | 5<br>(346)  | 7<br>(572)  | 1<br>(264)  | 4<br>(318)      | 1<br>(266)     | 1<br>(271)    |
|       | full.Correlation | 7<br>(-0.08)   | 5<br>(0.51) | 6<br>(0.27) | 2<br>(0.55) | 4<br>(0.52)     | 1<br>(0.56)    | 2<br>(0.55)   |
|       | avg.Correlation  | 7<br>(0.13)    | 5<br>(0.78) | 6<br>(0.66) | 1<br>(0.89) | 1<br>(0.90)     | 1<br>(0.90)    | 1<br>(0.90)   |
|       | Average rank     | 6.5            | 4.75        | 6.5         | 1.25        | 3.5             | 1              | 1.25          |
| Test  | full.RMSE        | 6<br>(621)     | 2<br>(478)  | 5<br>(609)  | 2<br>(484)  | 7<br>(705)      | 2<br>(493)     | 1<br>(474)    |
|       | avg.RMSE         | 5<br>(434)     | 1<br>(238)  | 5<br>(421)  | 3<br>(256)  | 5<br>(499)      | 4<br>(274)     | 1<br>(235)    |
|       | full.Correlation | 7<br>(-0.0007) | 5<br>(0.49) | 6<br>(0.11) | 1<br>(0.54) | 1<br>(0.54)     | 1<br>(0.54)    | 4<br>(0.53)   |
|       | avg.Correlation  | 7<br>(-0.0007) | 5<br>(0.76) | 6<br>(0.11) | 1<br>(0.79) | 1<br>(0.78)     | 1<br>(0.80)    | 4<br>(0.78)   |
|       | Average rank     | 6.25           | 3.25        | 5.5         | 1.75        | 3.5             | 2              | 2.5           |

124

125
